# Supplementary material
Source: PubMed Central journal article supplement (PMC5108064)
Supplement: CEI-186-336-s001.pdf [file CEI-186-336-s001.pdf]

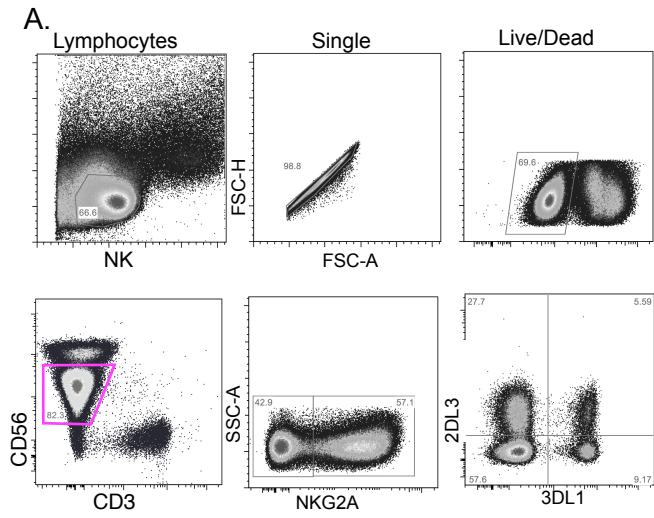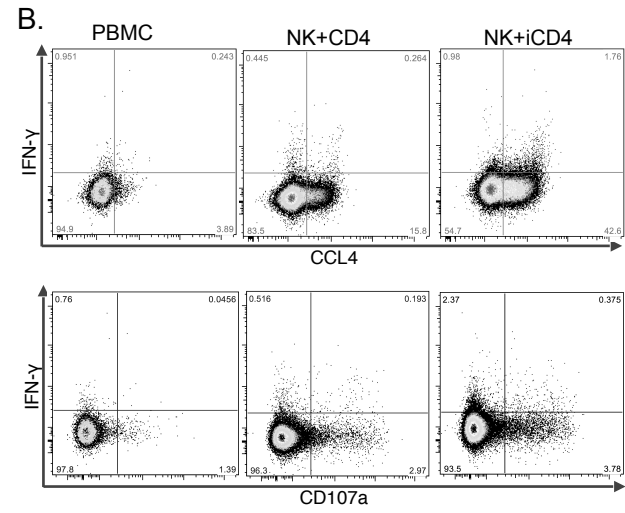

A.

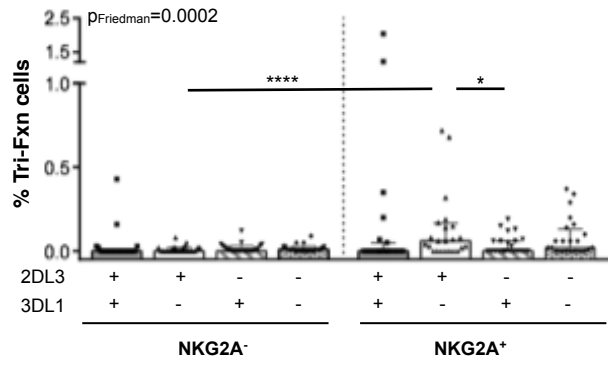

B.

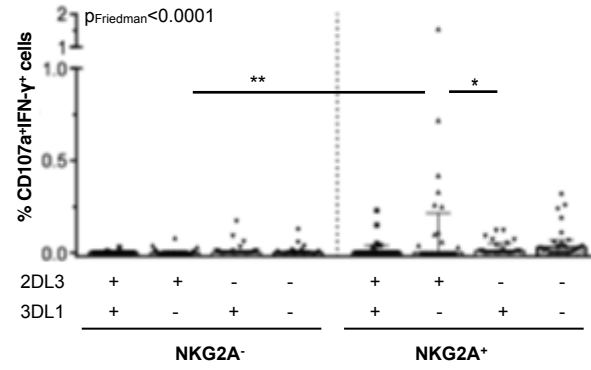

C.

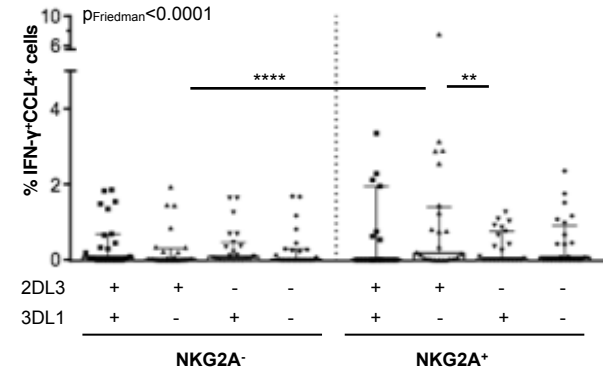

Figure S3

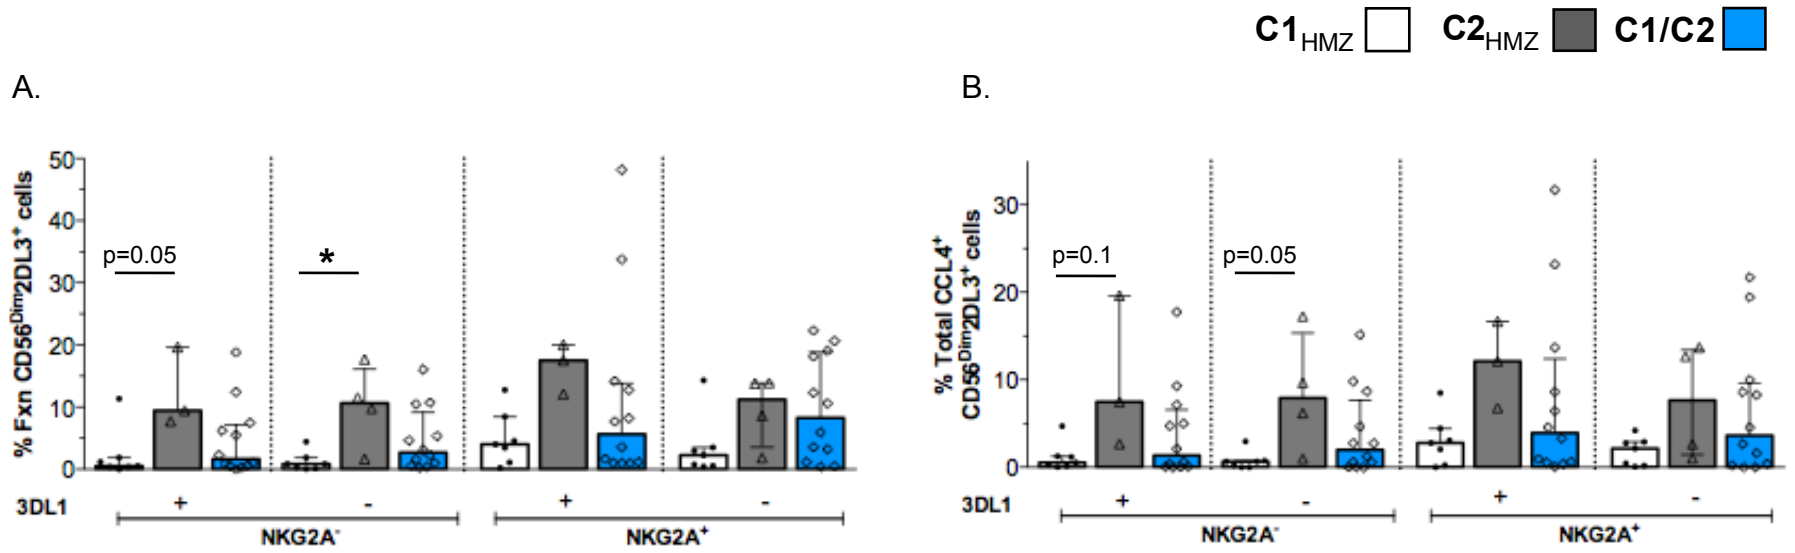

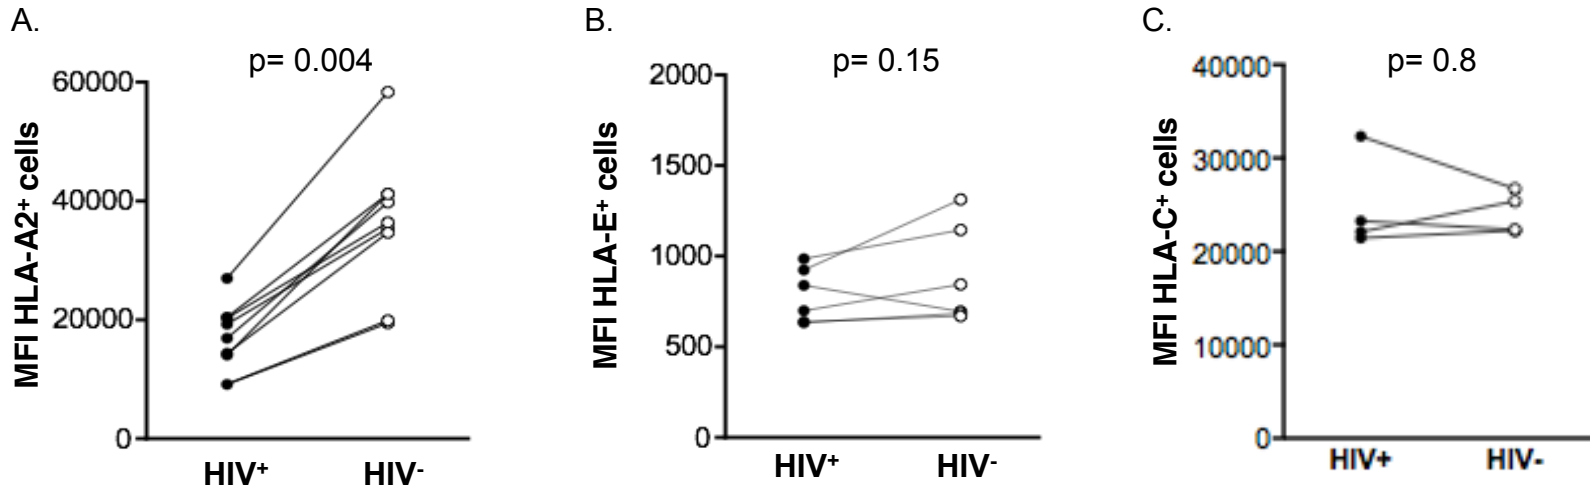

Figure S5

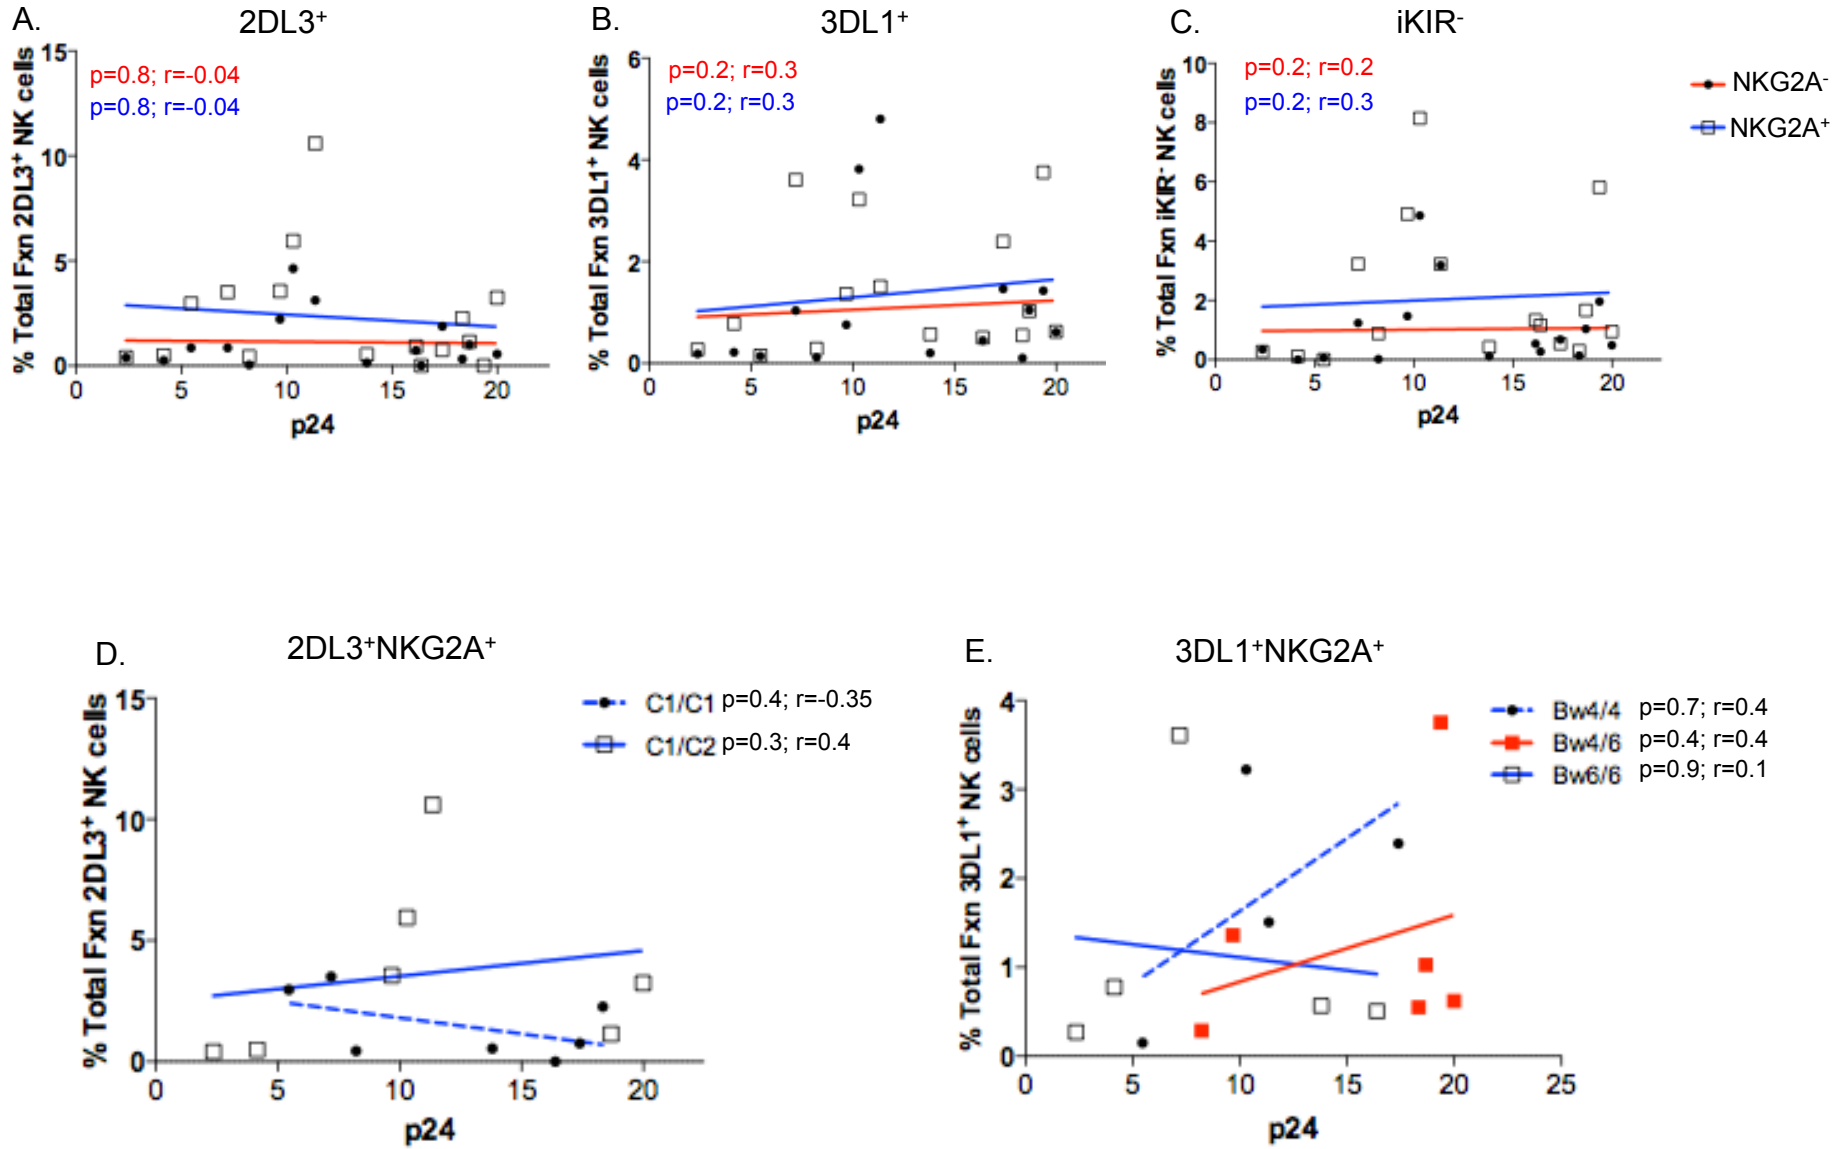

**Supplementary Figure 1. The gating strategy used to identify iNKR population and functional subsets.** (A). Cells were gated on the live singlet lymphocyte population. NK cells were defined as CD3<sup>+</sup>CD56<sup>+</sup> and those that were CD56<sup>Dim</sup> were distinguished from CD56<sup>bright</sup>. NK cells positive for the iNKR NKG2A, 2DL3 and/or 3DL1 were analyzed from the CD56<sup>Dim</sup> gate. (B) Functional gates for IFN- $\gamma$ , CCL4 and CD107a were set on gated CD56<sup>Dim</sup>NK cells from HIV uninfected peripheral blood mononuclear cells (PBMC) (left hand panels). The background for NK cells stimulated with iCD4 (NK+iCD4) (right hand panels) was NK cells co-cultured with autologous uninfected CD4 cells (NK+CD4) (middle panels). The background for the NK+CD4 is higher than the PBMC gating control due to the media required to culture purified NK cells, R10 supplemented with IL-2, as described in the *Materials and methods* section.

**Supplementary Figure 2. iCD4 stimulation of functional subsets contributing to the differential responsiveness of CD56<sup>Dim</sup>NKG2A<sup>+</sup>2DL3<sup>+</sup> NK cell populations.** The frequency of iCD4 stimulated NK cell populations characterized by trifunctional (A), CD107a<sup>+</sup>IFN- $\gamma$ <sup>+</sup> (B) and IFN- $\gamma$ <sup>+</sup>CCL4<sup>+</sup> (C) response profiles are shown in the y-axis for each CD56<sup>Dim</sup>NKG2A<sup>+</sup>2DL3<sup>+</sup>3DL1<sup>+</sup> population. Bar height represents the median IQR for each group. Data from 24 individuals analyzed in duplicate were used to generate these results. Friedman ( $p_{\text{Friedman}}$ ) and Wilcoxon (\*) tests were used to determine significance between data sets. P-values for between group comparisons are shown over lines linking the two groups being compared.

**Supplementary Figure 3. HIV iCD4 stimulation of functional NK cell subsets contributing to the differential responsiveness of CD56<sup>Dim</sup>NKG2A<sup>+</sup>2DL3<sup>+</sup>3DL1<sup>+</sup> NK cell populations stratified by HLA-C groups.** The frequency of iCD4 stimulated CD56<sup>Dim</sup>NKG2A<sup>+</sup>2DL3<sup>+</sup>3DL1<sup>+</sup> NK cells from C1 homozygotes (C1<sub>HMZ</sub>; n=7), C2 homozygotes (C2<sub>HMZ</sub>; n=4) and heterozygous (C1/C2; n=12) characterized by total responsiveness (A) and total CCL4 secretion (B) response profiles are shown on the y-axis. Bar heights and error bars represent the median and IQR for each group. Data from 23 individuals positive for a 2DL3 allele, analyzed in duplicate, are plotted. Kruskal-Wallis with Dunn's post tests were used to determine the significance of between group differences. “\*” =  $p < 0.05$ . The data obtained were corrected for background using results obtained following stimulation with uninfected CD4 cells. All data points are displayed, including significant outliers.

**Supplementary Figure 4. Surface HLA levels following *in vitro* HIV infection of purified and stimulated CD4 cells.** The MFI of HLA-A\*02 (A) and HLA-E (B) are shown on the y-axis following *in vitro* HIV infection, as described in materials and methods. Individuals tested for HLA-E were negative by allotyping for HLA-B\*27, B\*40, C\*17 and C\*04:03 alleles that have been shown to cross-react with 3D12 antibody. Wilcoxon tests were used to determine significance between data sets. P-values for between group comparisons are shown over lines linking the two groups being compared. HIV+: HIV-infected CD4 cells. HIV-: HIV-uninfected CD4 cells.

**Supplementary Figure 5. Correlation between percentage of p24<sup>+</sup>iCD4 cells used for stimulation and total responsiveness of NK cell populations.** The frequency of total responsiveness of 2DL3<sup>+</sup> (A), 3DL1<sup>+</sup> (B) and iKIR<sup>-</sup> (C) NK cells (y-axis) following stimulation with autologous iCD4 was correlated with the frequency of p24<sup>+</sup> iCD4 (x-axis). Both iNKR<sup>+</sup> populations were positive for only the indicated iNKR (i.e. 2DL3<sup>+</sup>3DL1<sup>-</sup> [A] or 2DL3<sup>-</sup>3DL1<sup>+</sup> [B]). In panel C both the NKG2A<sup>+</sup> (blue) and NKG2A<sup>-</sup> (red) sub-populations of NK cells were 2DL3<sup>-</sup>3DL1<sup>-</sup>. Correlations between the frequency of iCD4 induced functional NKG2A<sup>+</sup>2DL3<sup>+</sup> (D) and NKG2A<sup>+</sup>3DL1<sup>+</sup> (E) NK cells with the frequency of p24<sup>+</sup> iCD4 were examined in cells from individuals who expressed 1 or 2 copies of the cognate ligand for 2DL3 (D) or who expressed 1 or 2 copies or no cognate ligand for 3DL1 (E). Spearman tests were used to obtain correlation coefficients and two-tailed p-values for the strength of the correlations between the parameters examined.
